# Supplementary material for: Cavin3 released from caveolae interacts with BRCA1 to regulate the cellular stress response
Source: eLife journal article supplement (doi:10.7554/elife.61407), 2021-06-18
Supplement: fig1-figsupp1-data2 [file elife-61407-fig1-figsupp1-data2-v2.pdf]

Figure 1-figure supplement 1-source data 2

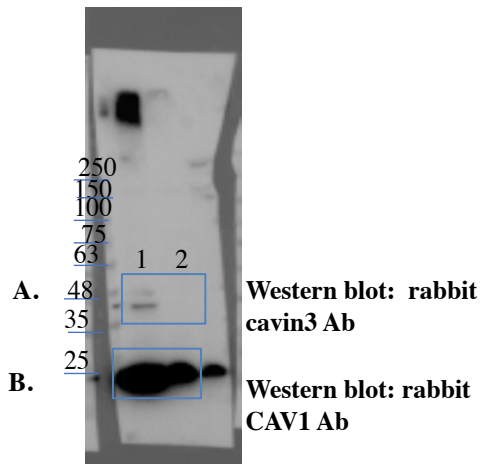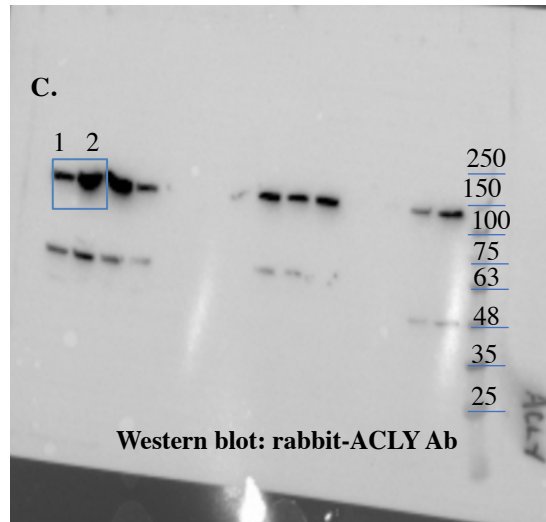

**A. Western blot: rabbit cavin3 Ab**

1. WT HeLa
2. cavin3 KO cells

**B. Western blot: rabbit CAV1 Ab**

1. WT HeLa
2. cavin3 KO cells

**C. Western blot: rabbit CAV1 Ab**

1. WT HeLa
2. cavin3 KO cells

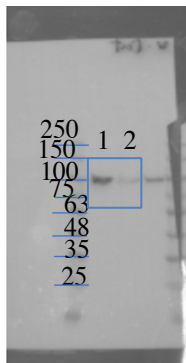

**D. Western blot: mouse catenin Ab**

1. WT HeLa
2. cavin3 KO cells

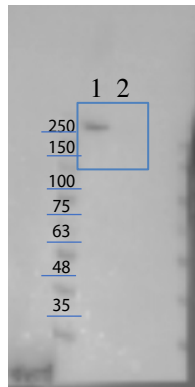

**E. Western blot: rabbit ACCA Ab**

1. WT HeLa
2. cavin3 KO cells

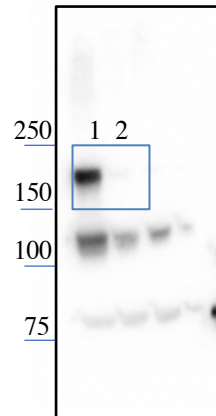

**F. Western blot: rabbit EGFR Ab**

1. WT HeLa
2. cavin3 KO cells
