# Supplementary material for: Cavin3 released from caveolae interacts with BRCA1 to regulate the cellular stress response
Source: eLife journal article supplement (doi:10.7554/elife.61407), 2021-06-18
Supplement: supp [file elife-61407-supp-v1.zip]

Figure 1-figure supplement 1-source data 1.

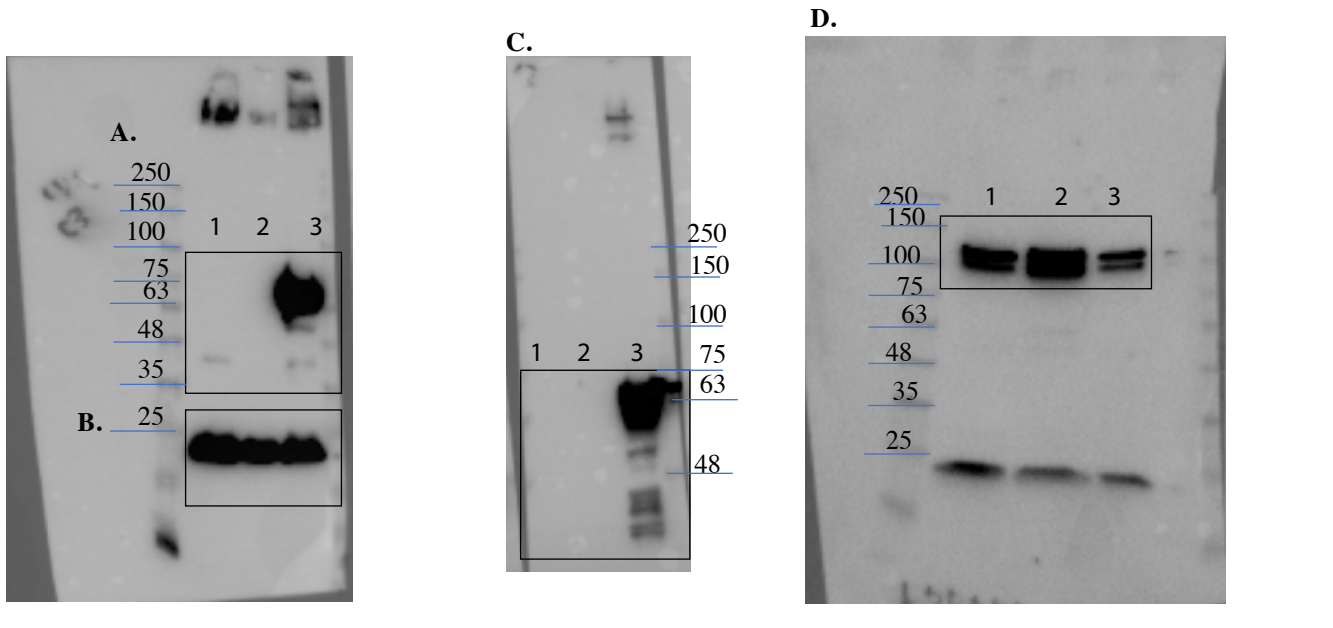

**A. Western blot: rabbit cavin3 Ab**

1. WT HeLa cells
2. cavin3 KO cells
3. cavin3 KO + cavin3-GFP

**B. Western blot: rabbit CAV1 Ab**

1. WT HeLa cells
2. cavin3 KO cells
3. cavin3 KO + cavin3-GFP

**C. Western blot: mouse GFP Ab**

1. WT HeLa cells
2. cavin3 KO cells
3. cavin3 KO + cavin3-GFP

**D. Western blot: rabbit DDX21 Ab**

1. WT HeLa cells
2. cavin3 KO cells
3. cavin3 KO + cavin3-GFP

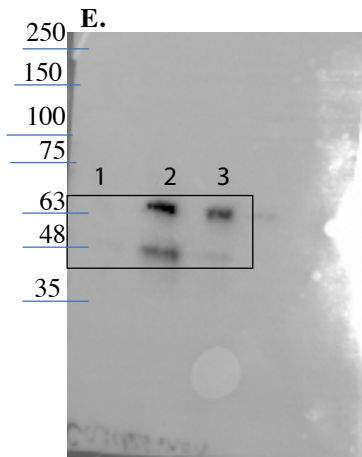

**E. Western blot: mouse Caldesmon Ab**

1. WT HeLa cells
2. cavin3 KO cells
3. cavin3 KO + cavin3-GFP

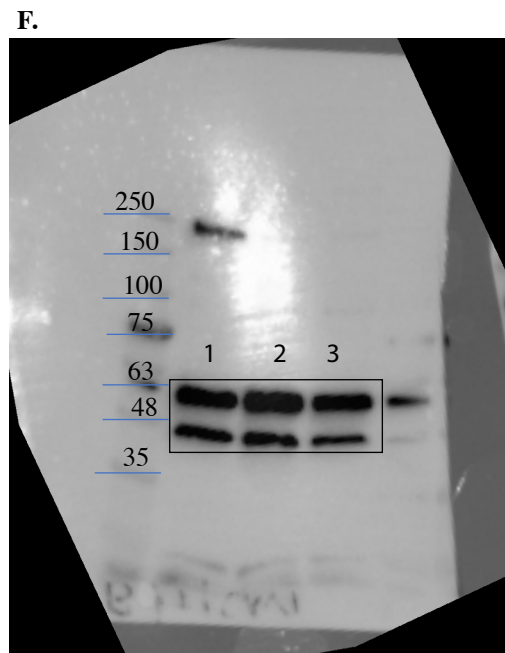

**F. Western blot: mouse Tubulin Ab**

1. WT HeLa cells
2. cavin3 KO cells
3. cavin3 KO + cavin3-GFP
