# Supplementary material for: Cavin3 released from caveolae interacts with BRCA1 to regulate the cellular stress response
Source: eLife journal article supplement (doi:10.7554/elife.61407), 2021-06-18
Supplement: supp [file elife-61407-supp-v1.zip]

Figure 4-source data 2.

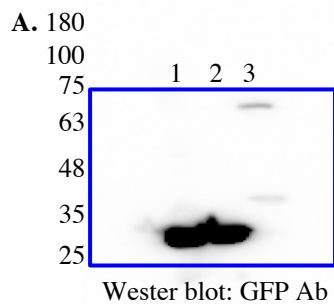

**A. Western blot: mouse GFP Ab**

1. MCF-7/GFP Untreated
2. MCF-7/GFP + MG 132
3. MCF-7/Cavin3-GFP Untreated

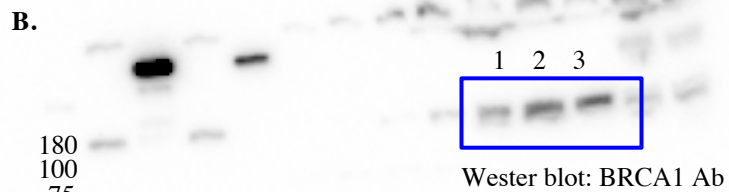

**B. Western blot: rabbit BRCA1 Ab**

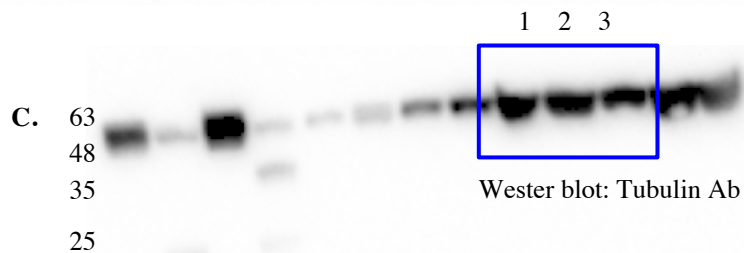

**C. Western blot: mouse Tubulin Ab**

1. MCF-7/GFP Untreated
2. MCF-7/GFP + MG 132
3. MCF-7/Cavin3-GFP Untreated
