# Supplementary material for: Cavin3 released from caveolae interacts with BRCA1 to regulate the cellular stress response
Source: eLife journal article supplement (doi:10.7554/elife.61407), 2021-06-18
Supplement: supp [file elife-61407-supp-v1.zip]

Figure 8-figure supplement 2-source data 1.

**A.**

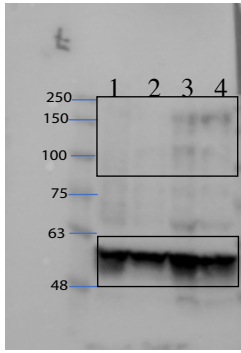

**Western blot: anti-FANCD2 Ab**

1. WT
2. WT + FANCD2 KO
3. cavin3 KO
4. cavin3 + FANCD2 KO

**B.**

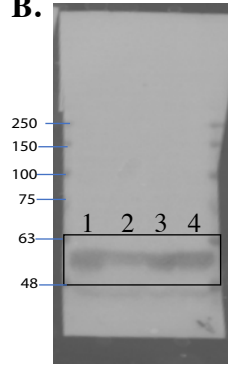

**Western blot: anti-actin Ab**

1. WT
2. WT + FANCD2 KO
3. cavin3 KO
4. cavin3 + FANCD2 KO

**C.**

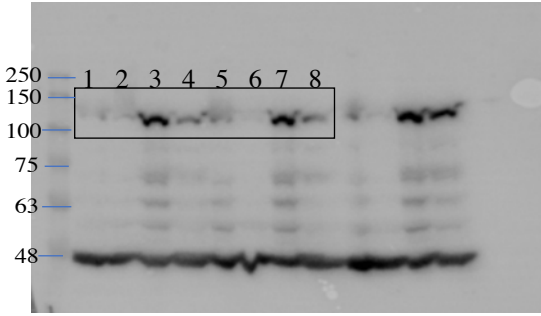

**Western blot: anti-PARP1 Ab**

1. WT
2. WT + PARP1 KO clone1
3. cavin3 KO
4. cavin3 + PARP1 KO clone 1
5. WT
6. WT + PARP1 KO clone 3
7. cavin3 KO
8. cavin3 KO + PARP 1 clone 3

**D.**

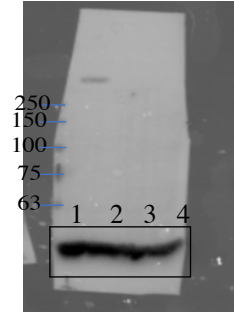

**Western blot: anti-Tubulin Ab**

1. WT
2. WT + PARP1 KO clone1
3. cavin3 KO
4. cavin3 + PARP1 KO clone 1

**E.**

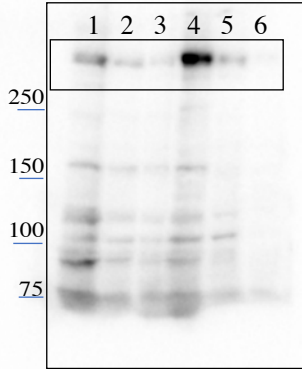

**Western blot: anti-CHD3 Ab**

1. WT
2. WT + CHD3 KO clone1
3. WT + CHD3 KO clone 3
4. cavin3 KO
5. cavin3 KO + CHD3 clone 1
6. cavin3 KO + CHD3 clone 3

**F.**

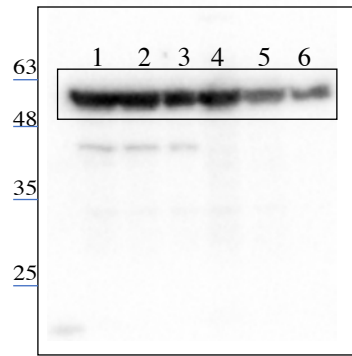

**Western blot: anti-Tubulin Ab**

1. WT
2. WT + CHD3 KO clone1
3. WT + CHD3 KO clone 3
4. cavin3 KO
5. cavin3 KO + CHD3 clone 1
6. cavin3 KO + CHD3 clone 3

**G.**

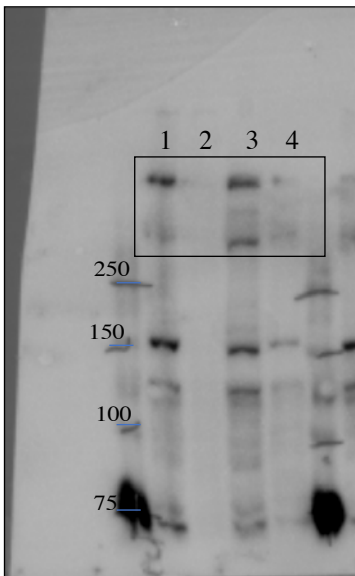

**Western blot: anti-53BP1 Ab**

1. WT
2. WT + 53BP1 KO
3. cavin3 KO
4. cavin3 + 53BP1 KO

**H.**

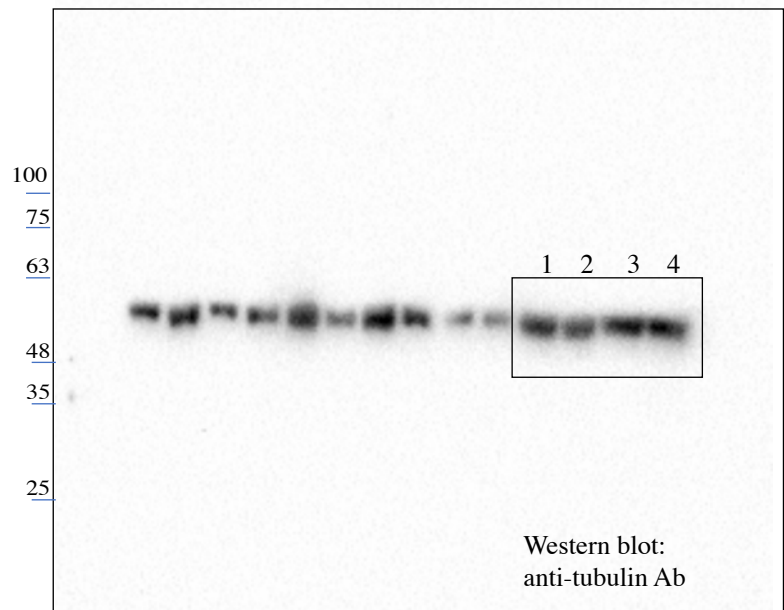

**Western blot: anti-Tubulin Ab**

1. WT
2. WT + 53BP1 KO
3. cavin3 KO
4. cavin3 + 53BP1 KO
