# Supplementary material for: Cavin3 released from caveolae interacts with BRCA1 to regulate the cellular stress response
Source: eLife journal article supplement (doi:10.7554/elife.61407), 2021-06-18
Supplement: supp [file elife-61407-supp-v1.zip]

**Figure 8-source data 2.**

**A.**

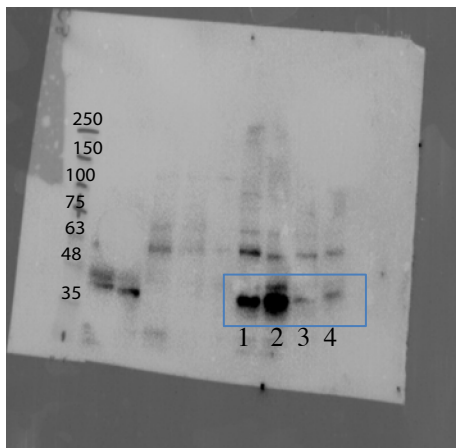

**A. Western blot: rabbit cavin3 Ab**

1. WT untreated
2. WT + UV treatment 4 hour chase
3. cavin3 KO untreated
4. cavin3 KO + UV treatment 4 hour chase

**B.**

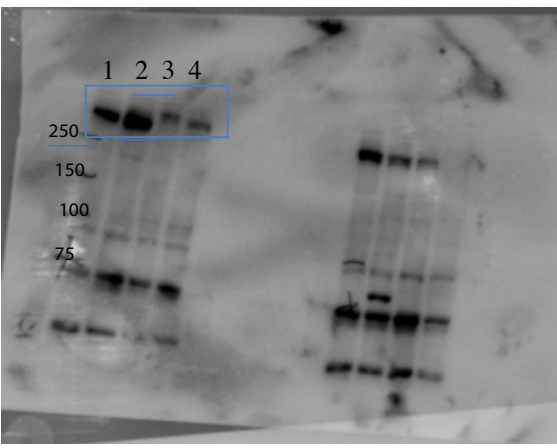

**B. Western blot: rabbit BRCA1 Ab**

1. WT untreated
2. WT + UV treatment 4 hour chase
3. cavin3 KO untreated
4. cavin3 KO + UV treatment 4 hour chase

**C.**

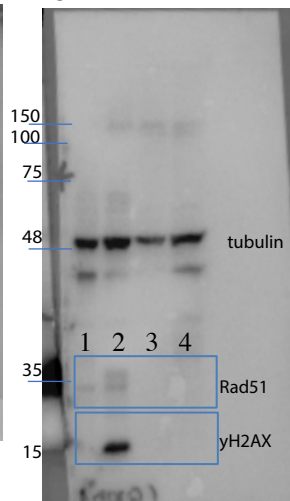

**C. Western blot: rabbit Rad51 and γH2AX**

1. WT untreated
2. WT + UV treatment 4 hour chase
3. cavin3 KO untreated
4. cavin3 KO + UV treatment 4 hour chase

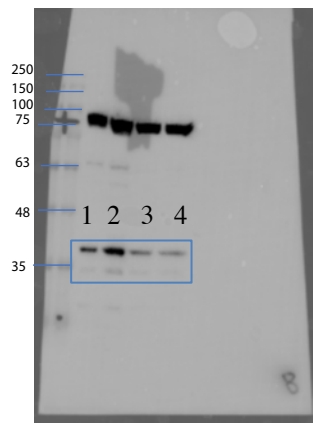

**D. Western blot: rabbit BRCC36 Ab**

1. WT untreated
2. WT + UV treatment 4 hour chase
3. cavin3 KO untreated
4. cavin3 KO + UV treatment 4 hour chase

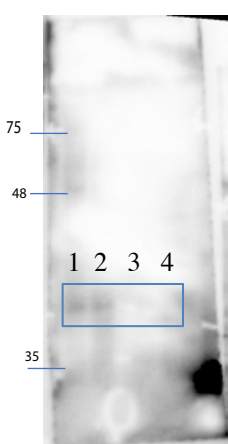

**E. Western blot: sheep Merit 40Ab**

1. WT untreated
2. WT + UV treatment 4 hour chase
3. cavin3 KO untreated
4. cavin3 KO + UV treatment 4 hour chase

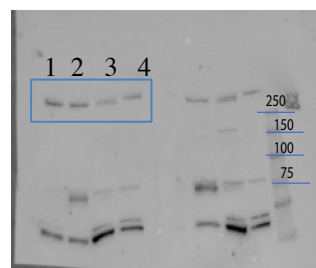

**F. Western blot: rabbit BRCA2 Ab**

1. WT untreated
2. WT + UV treatment 4 hour chase
3. cavin3 KO untreated
4. cavin3 KO + UV treatment 4 hour chase

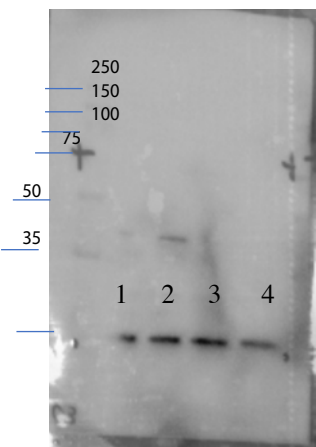

**G. Western blot: rabbit CAV1 Ab**

1. WT untreated
2. WT + UV treatment 4 hour chase
3. cavin3 KO untreated
4. cavin3 KO + UV treatment 4 hour chase

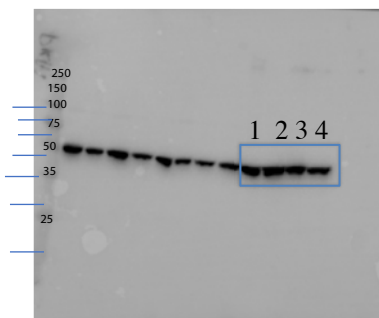

**H and I. Western blot: rabbit PKM and PGK Ab**

1. WT untreated
2. WT + UV treatment 4 hour chase
3. cavin3 KO untreated
4. cavin3 KO + UV treatment 4 hour chase

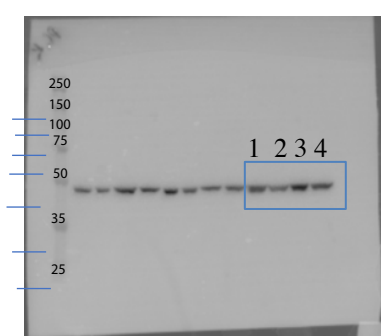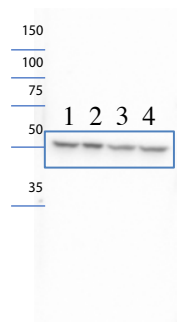

**J. Western blot: mouse actin Ab**

1. WT untreated
2. WT + UV treatment 4 hour chase
3. cavin3 KO untreated
4. cavin3 KO + UV treatment 4 hour chase
