# Supplementary material for: Cavin3 released from caveolae interacts with BRCA1 to regulate the cellular stress response
Source: eLife journal article supplement (doi:10.7554/elife.61407), 2021-06-18
Supplement: supp [file elife-61407-supp-v1.zip]

Figure 4-source data 4.

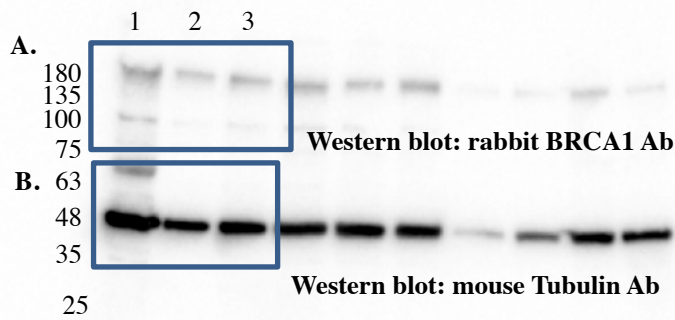

**A41 cells**

**A. Western blot: rabbit BRCA1Ab**

1. Control siRNA oligos
2. BRCA1 siRNA oligo 1
3. BRCA1 siRNA oligo 2

**B. Western blot: mouse Tubulin Ab**

1. Control siRNA oligos
2. BRCA1 siRNA oligo 1
3. BRCA1 siRNA oligo 2

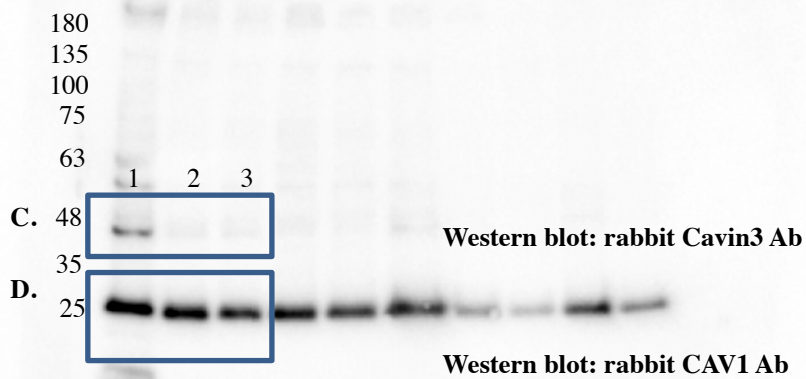

**C. Western blot: rabbit Cavin3 Ab**

1. Control siRNA oligos
2. BRCA1 siRNA oligo 1
3. BRCA1 siRNA oligo 2

**D. Western blot: rabbit CAV1 Ab**

1. Control siRNA oligos
2. BRCA1 siRNA oligo 1
3. BRCA1 siRNA oligo 2
