# Supplementary material for: Cavin3 released from caveolae interacts with BRCA1 to regulate the cellular stress response
Source: eLife journal article supplement (doi:10.7554/elife.61407), 2021-06-18
Supplement: supp [file elife-61407-supp-v1.zip]

Figure 4-source data 5.

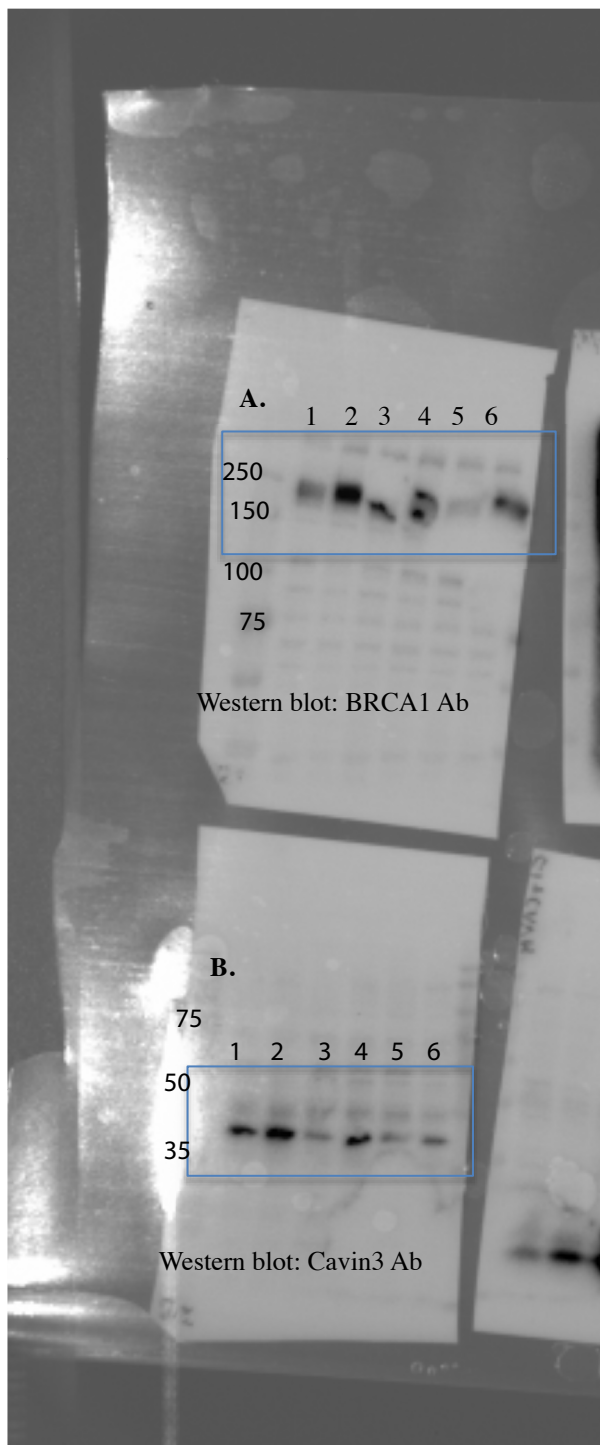

**B. Western blot: rabbit Cavin3 Ab**

1. Control KD no treatment
2. Control KD + MG132 6h
3. Cavin3 KD oligo 1 no treatment
4. Cavin3 KD oligo 1 + MG132 6h
5. Cavin3 KD oligo 2 no treatment
6. Cavin3 KD oligo 2 + MG132 6h

**A. Western blot: rabbit BRCA1 Ab**

1. Control KD no treatment
2. Control KD + MG132 6h
3. Cavin3 KD oligo 1 no treatment
4. Cavin3 KD oligo 1 + MG132 6h
5. Cavin3 KD oligo 2 no treatment
6. Cavin3 KD oligo 2 + MG132 6h

**A. Western blot long exposure: BRCA1 Ab**

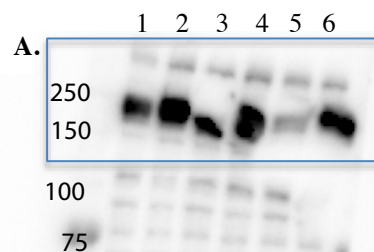

**B.**

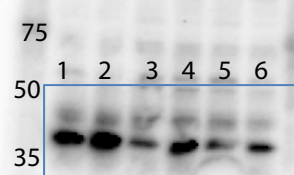

Western blot long exposure: Cavin3 Ab

**C.**

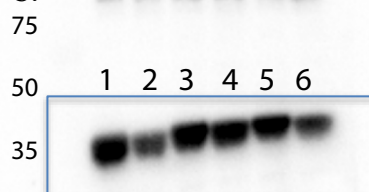

Western blot: Tubulin Ab

**C. Western blot: mouse Tubulin Ab**

1. Control KD no treatment
2. Control KD + MG132 6h
3. Cavin3 KD oligo 1 no treatment
4. Cavin3 KD oligo 1 + MG132 6h
5. Cavin3 KD oligo 2 no treatment
6. Cavin3 KD oligo 2 + MG132 6h
