# Supplementary material for: Cavin3 released from caveolae interacts with BRCA1 to regulate the cellular stress response
Source: eLife journal article supplement (doi:10.7554/elife.61407), 2021-06-18

Figure 4-figure supplement 1 source data 1.

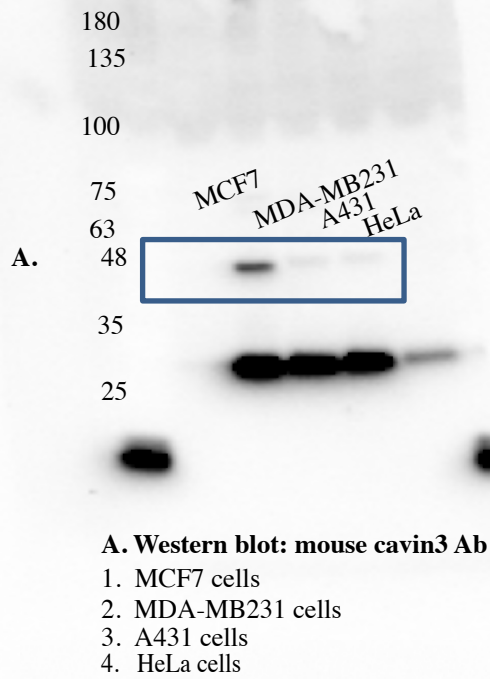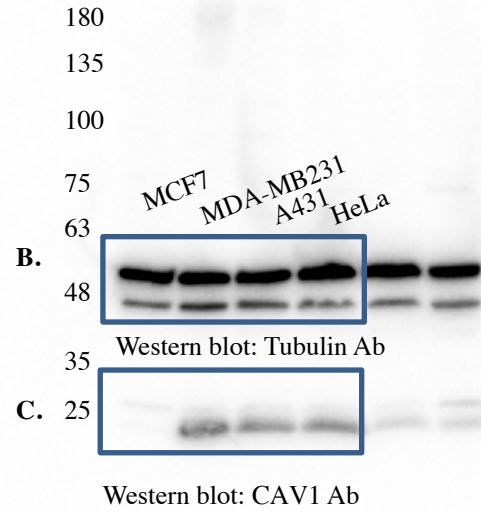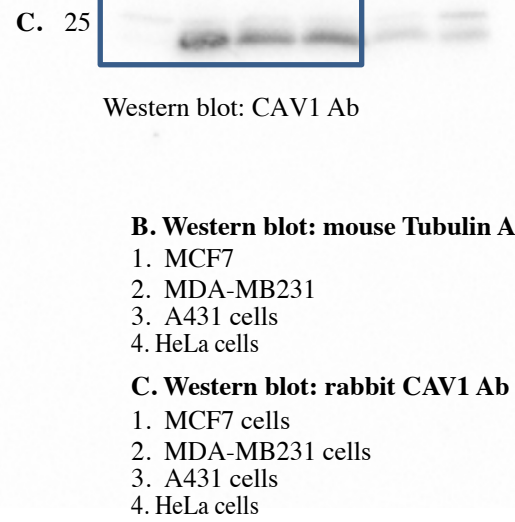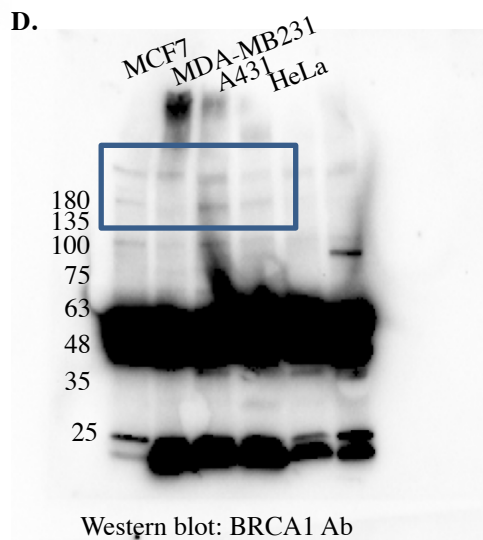

Supplement: supp [file elife-61407-supp-v1.zip]
