# Supplementary material for: Cavin3 released from caveolae interacts with BRCA1 to regulate the cellular stress response
Source: eLife journal article supplement (doi:10.7554/elife.61407), 2021-06-18
Supplement: supp [file elife-61407-supp-v1.zip]

Figure 4-source data 1.

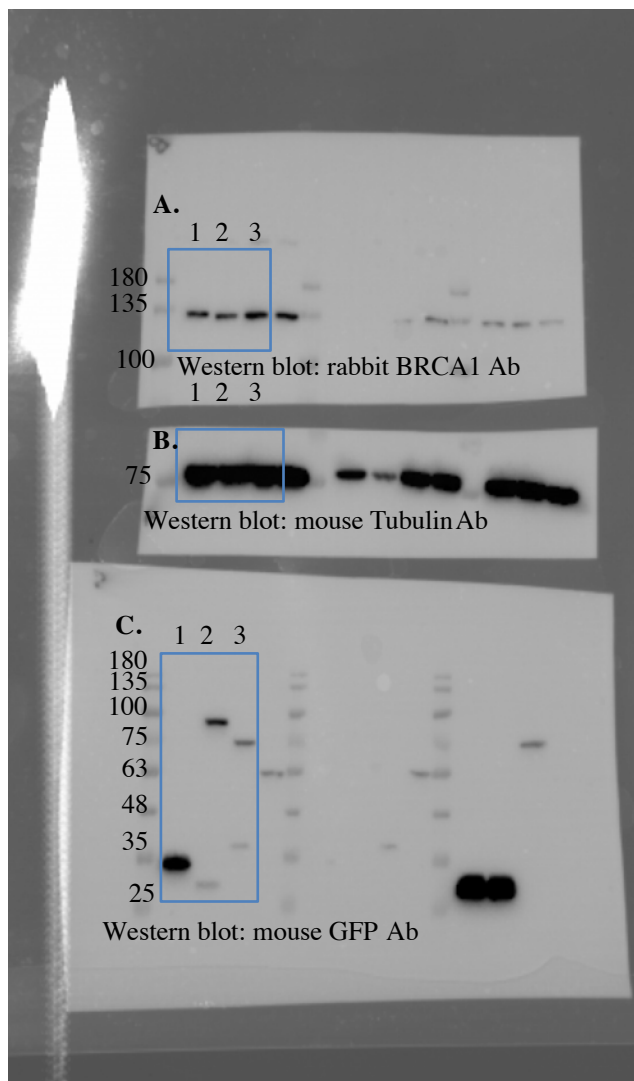

**A. Western blot: rabbit BRCA1 Ab**

1. GFP lysate
2. Cavin1-GFP lysate
3. Cavin3-GFP lysate

**B. Western blot: mouse Tubulin Ab**

1. GFP lysate
2. Cavin1-GFP lysate
3. Cavin3-GFP lysate

**C. Western blot: mouse GFP Ab**

1. GFP lysate
2. Cavin1-GFP lysate
3. Cavin3-GFP lysate
