# Supplementary figures and images for: Cavin3 released from caveolae interacts with BRCA1 to regulate the cellular stress response
Source: eLife journal article supplement (doi:10.7554/elife.61407), 2021-06-18

Figure 3-figure supplement 2.

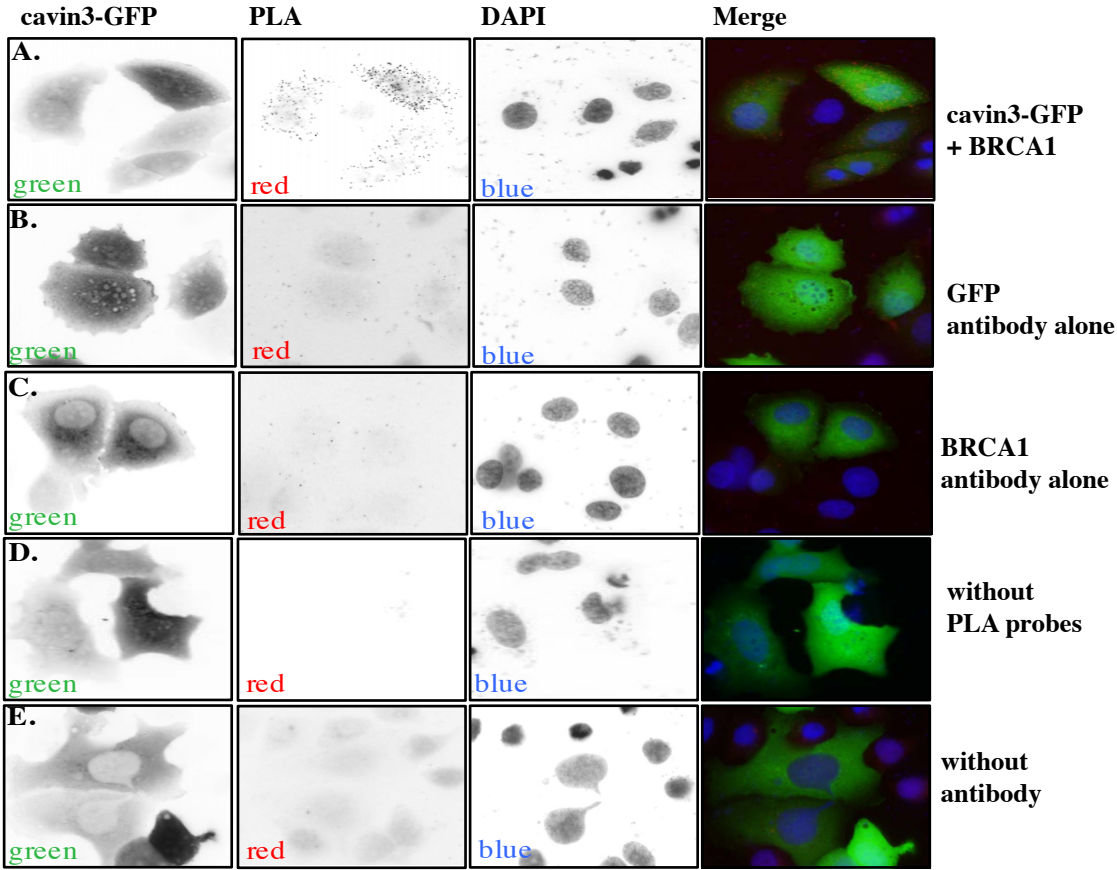

Supplement: supp [file elife-61407-supp-v1.zip]

**Figure 2-figure supplement 1.**

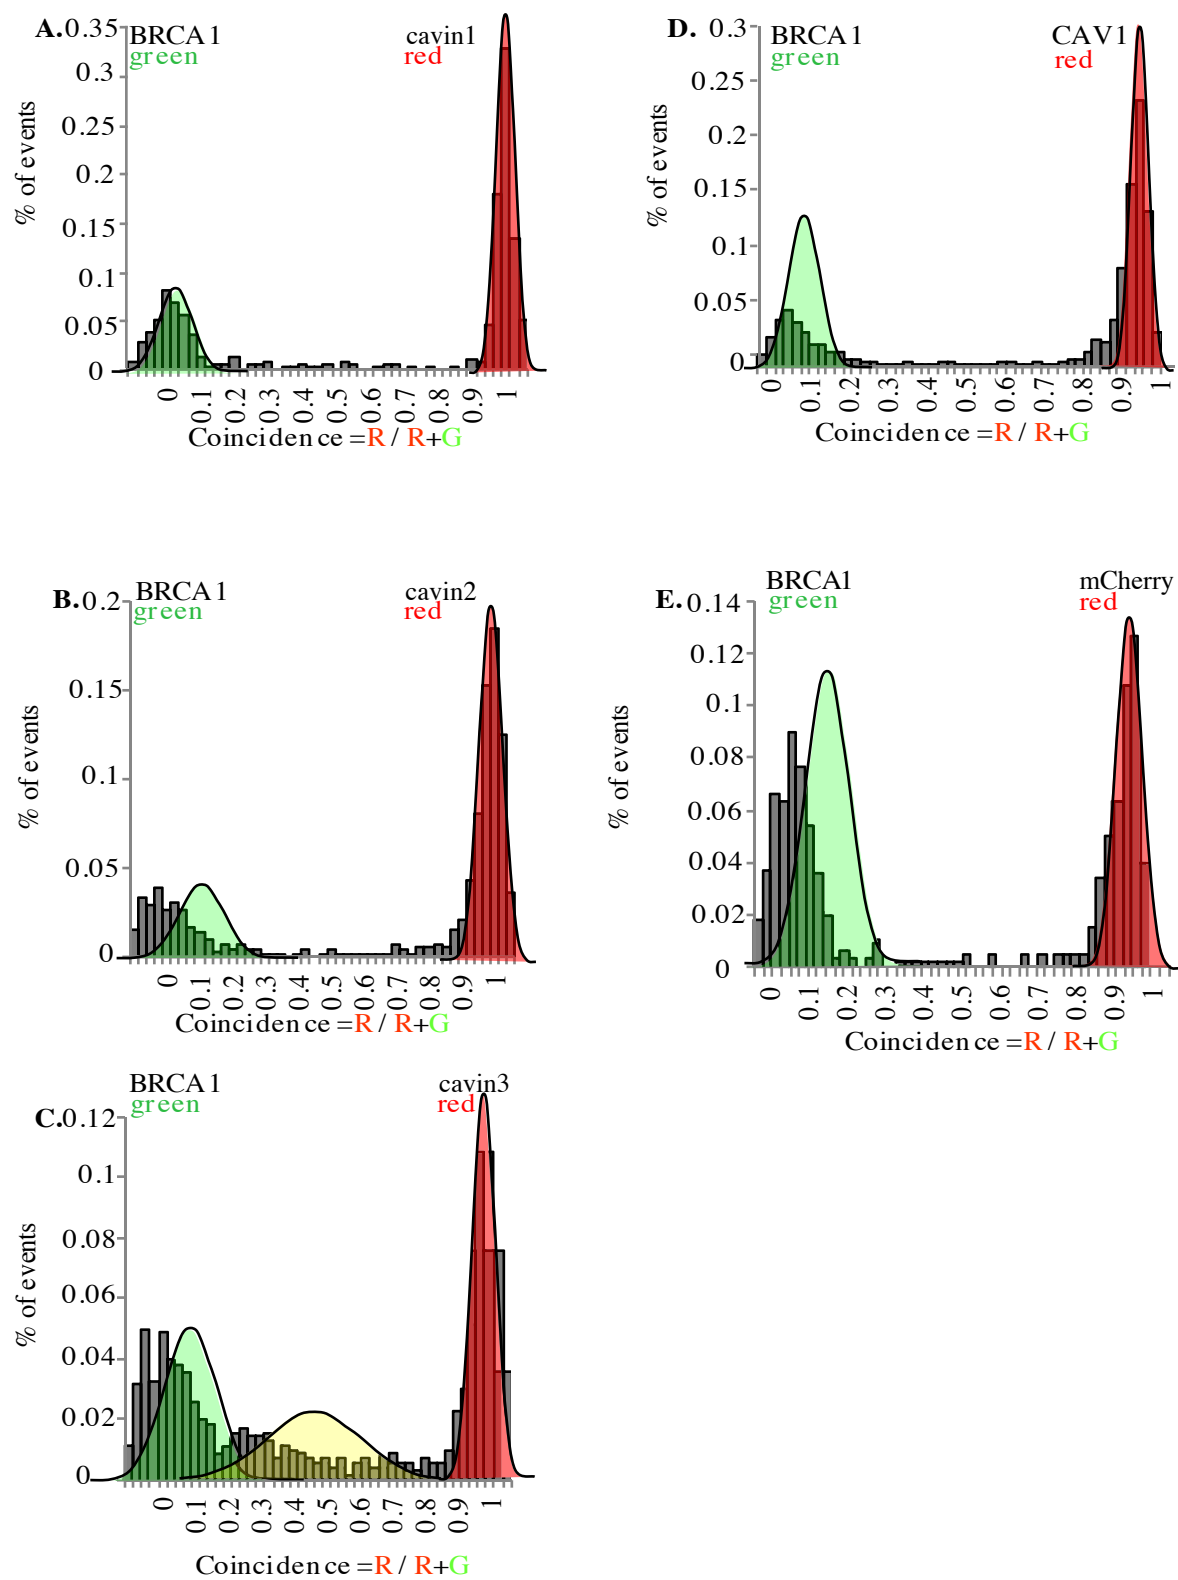

Supplement: supp [file elife-61407-supp-v1.zip]

Figure 8-figure supplement 1.

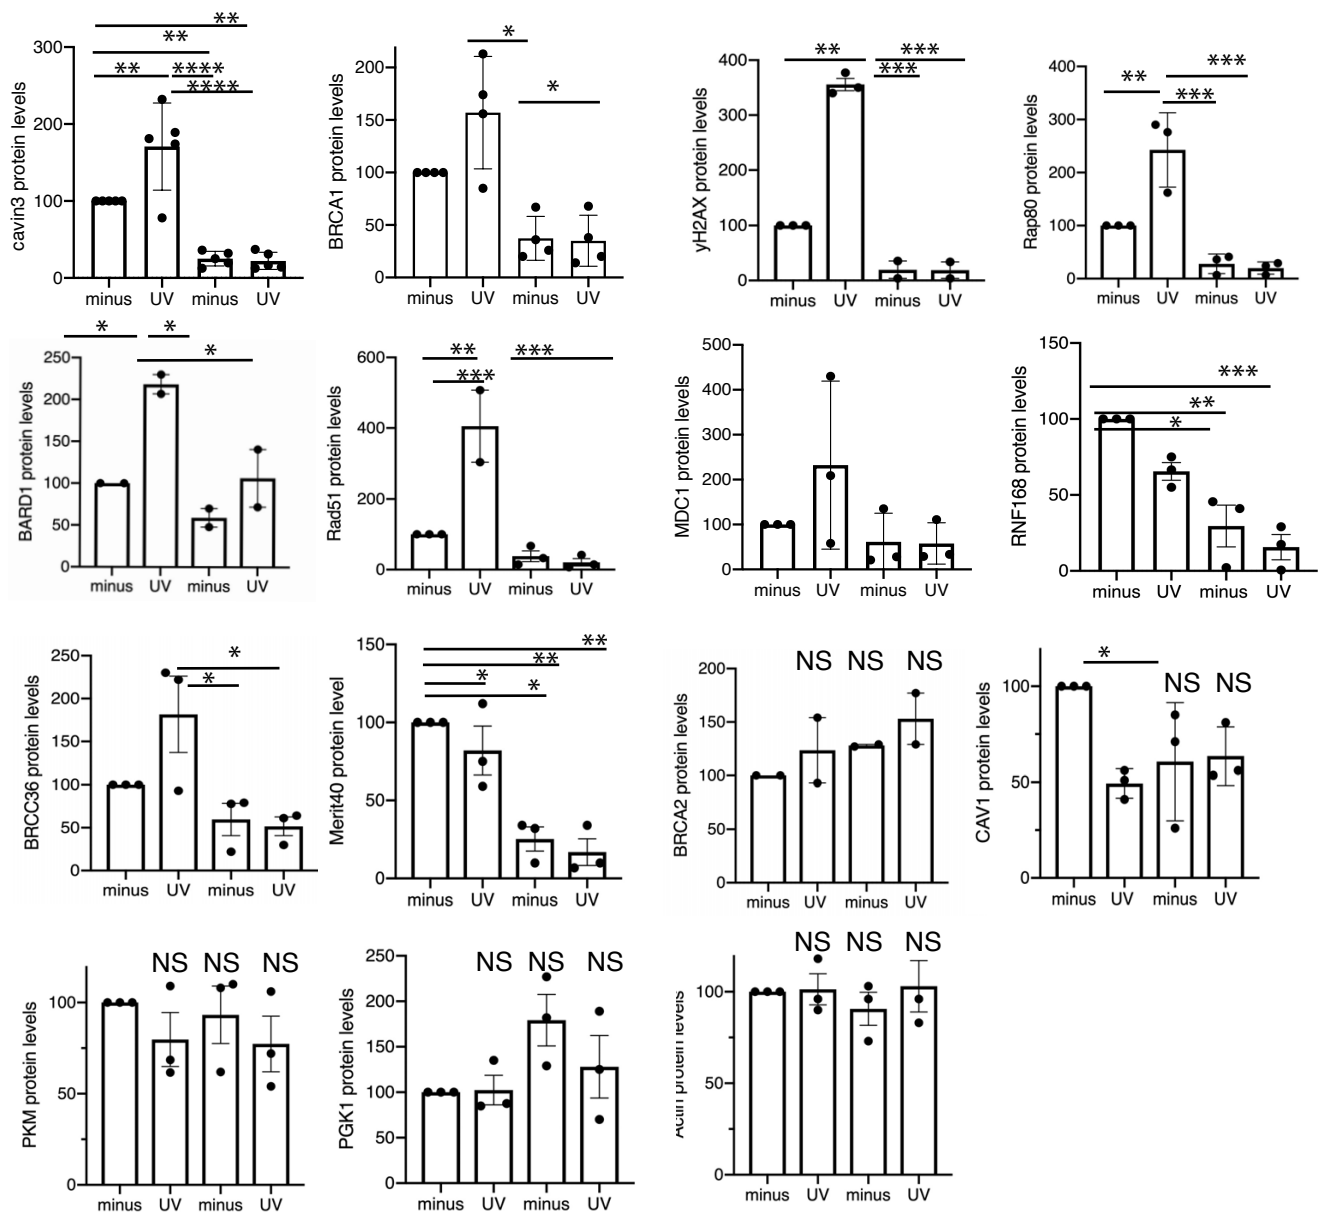

Supplement: supp [file elife-61407-supp-v1.zip]

Figure 7-figure supplement 2.

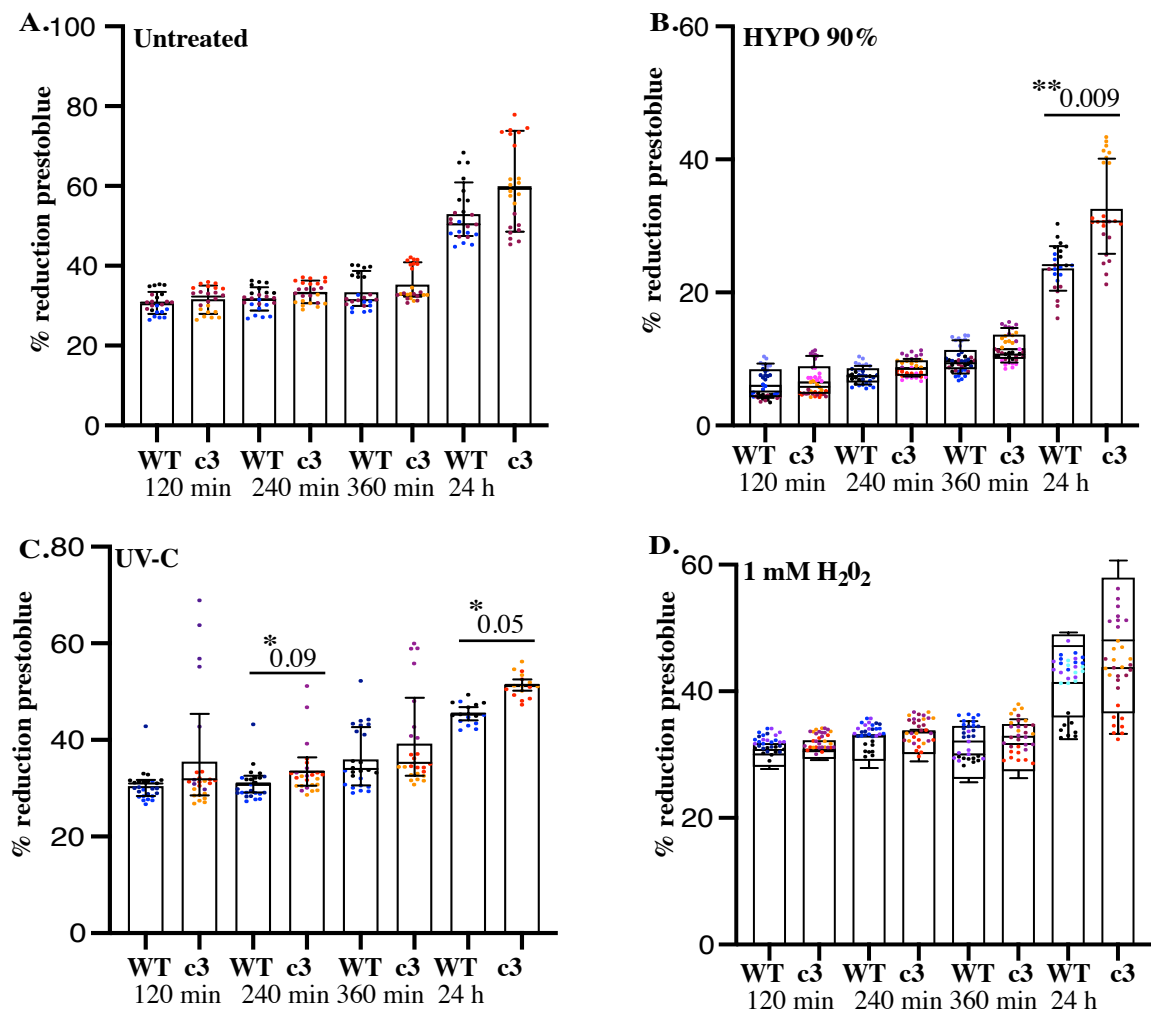

Supplement: supp [file elife-61407-supp-v1.zip]

Figure 4-figure supplement 2.

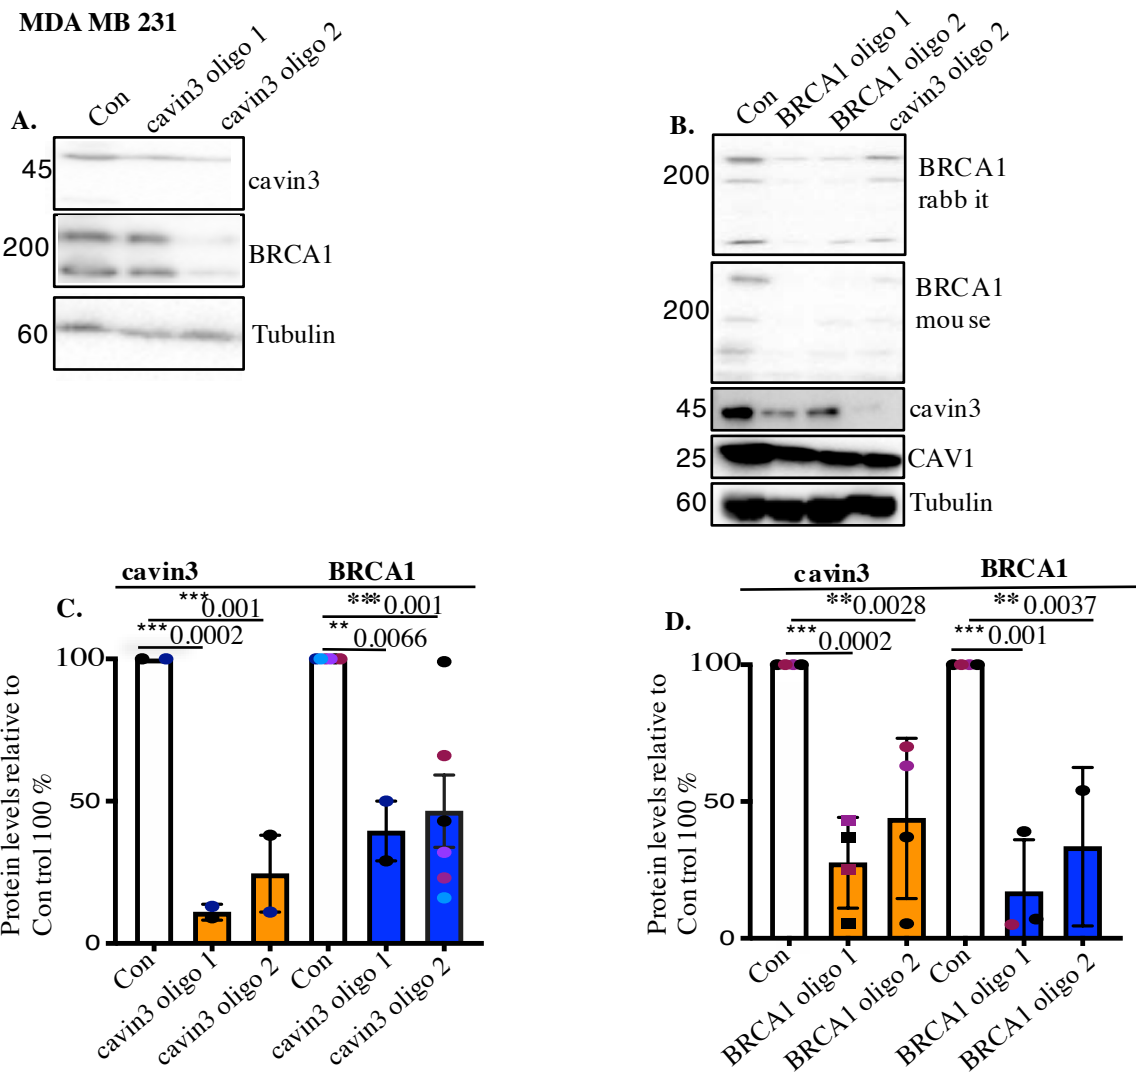

Supplement: supp [file elife-61407-supp-v1.zip]

Figure 4-figure supplement 3.

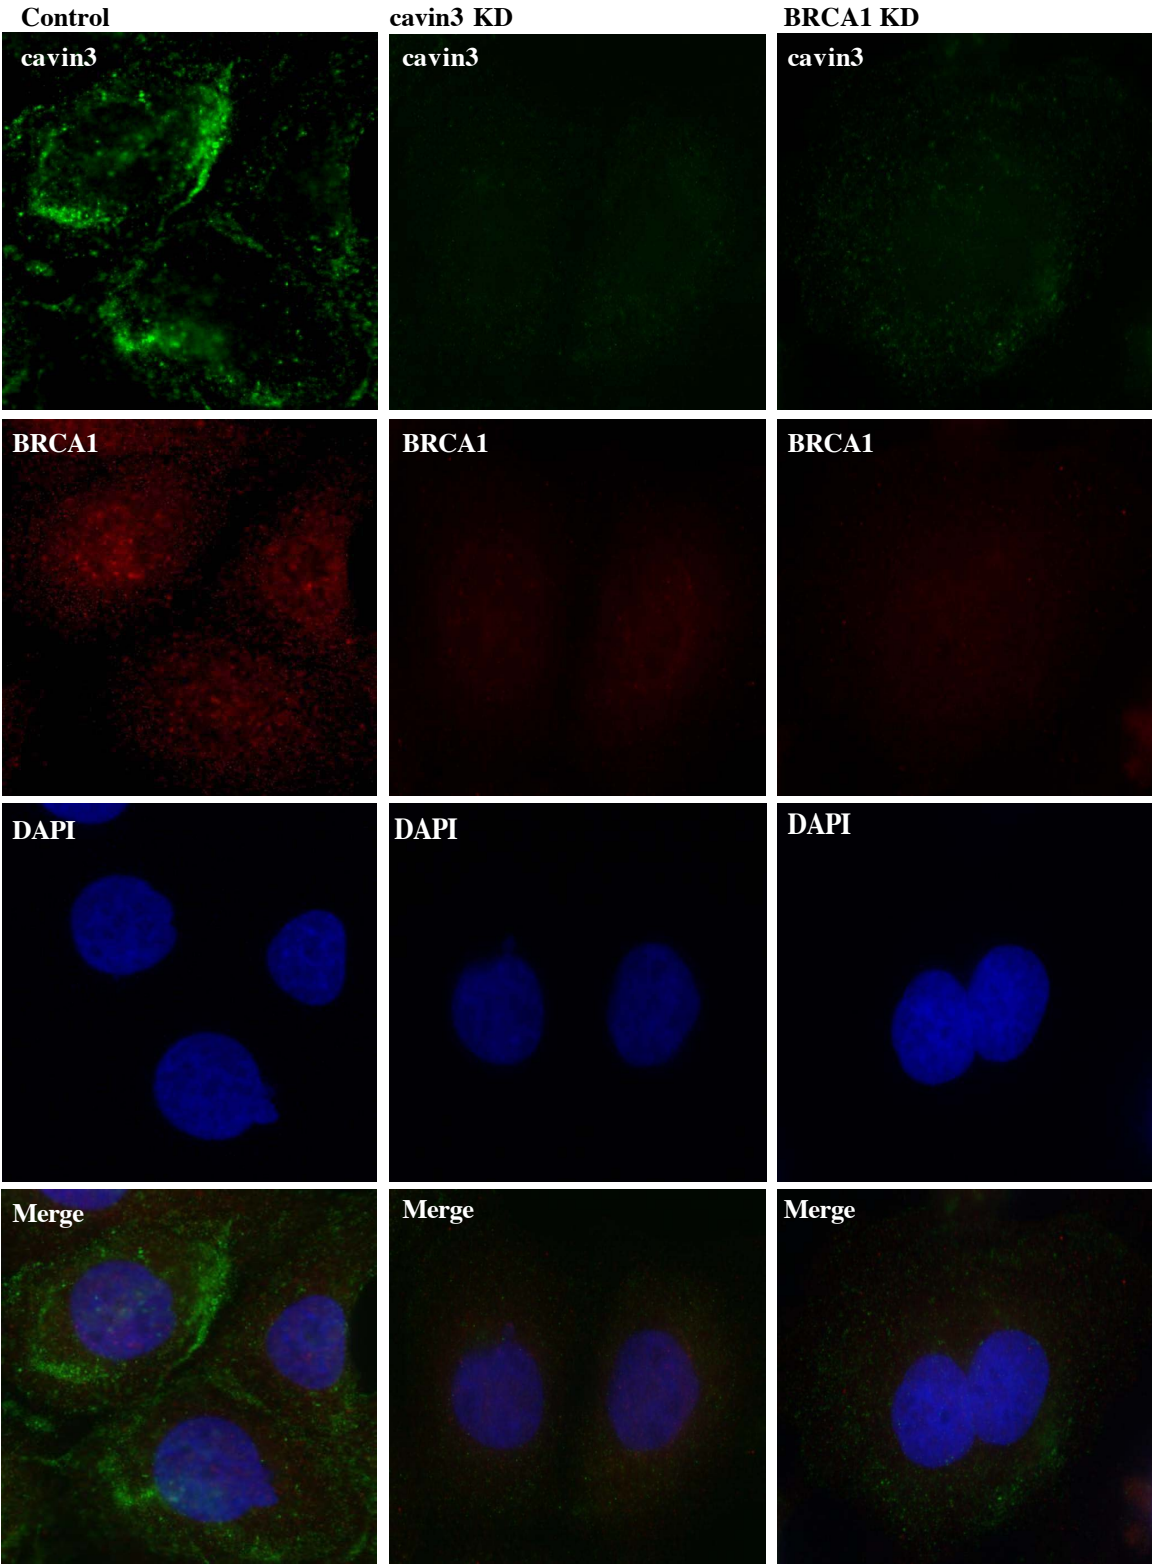

Supplement: supp [file elife-61407-supp-v1.zip]

Figure 3-figure supplement 1.

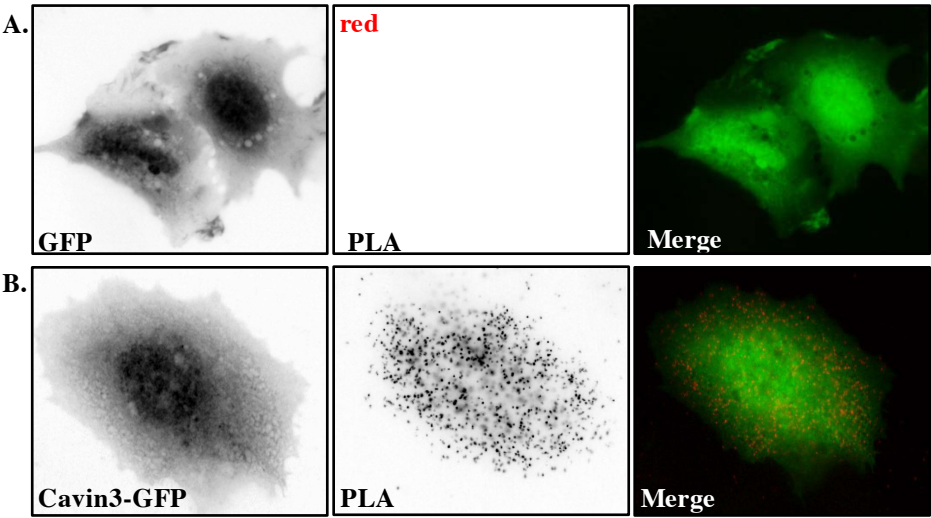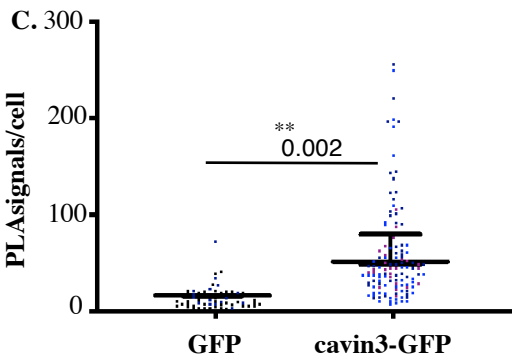

Supplement: supp [file elife-61407-supp-v1.zip]

Figure 8-figure supplement 2.

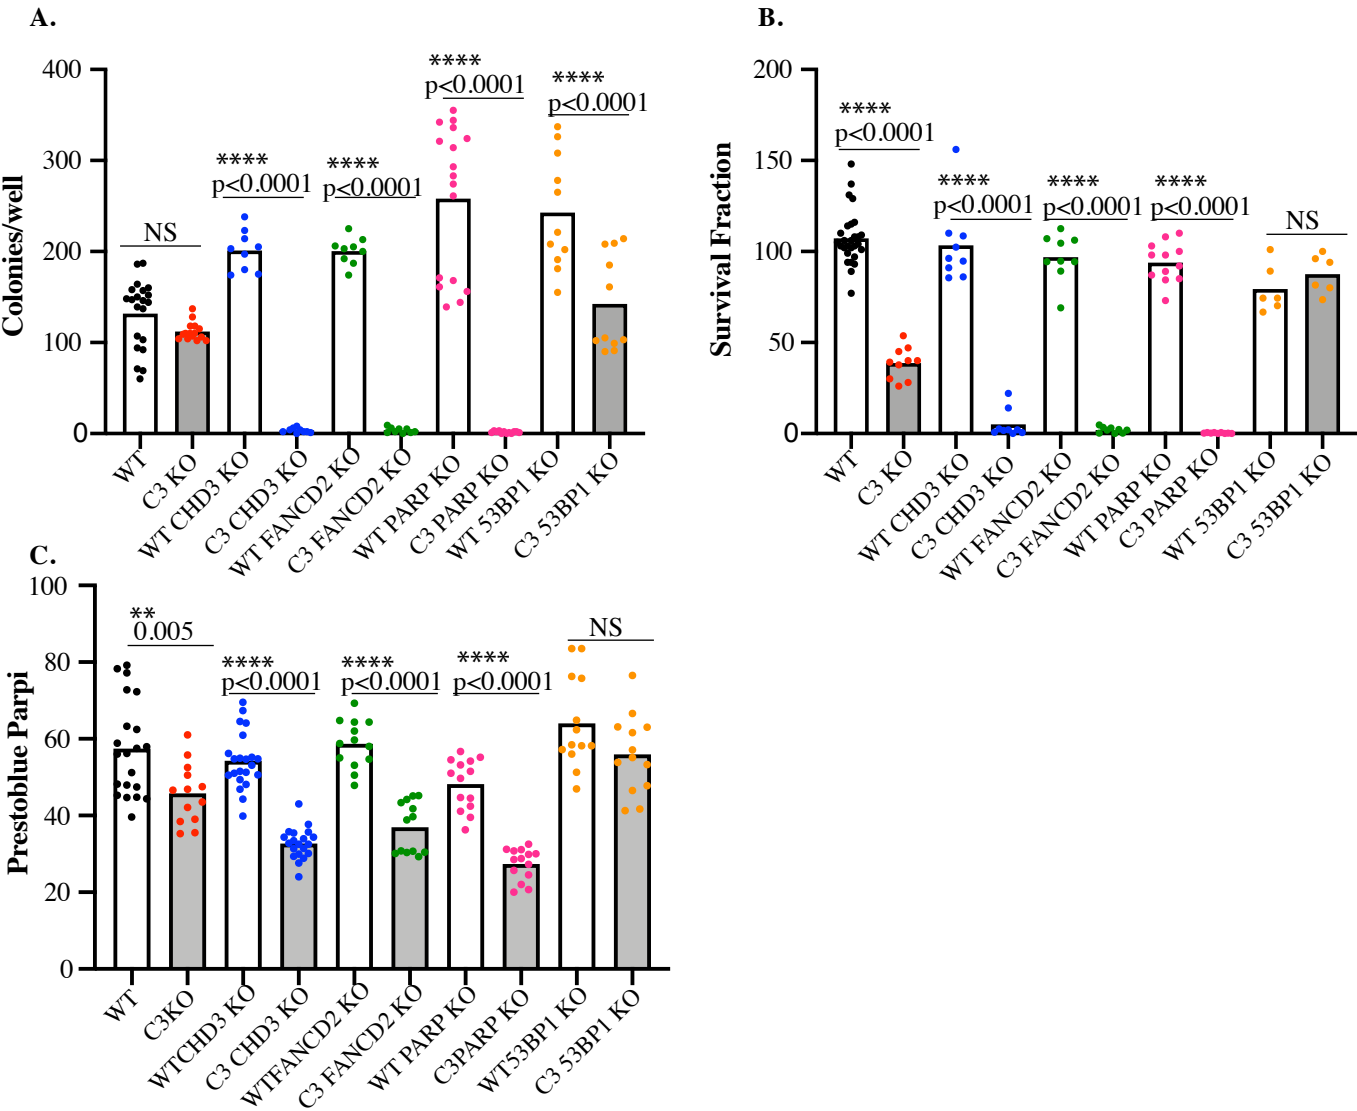

Supplement: supp [file elife-61407-supp-v1.zip]

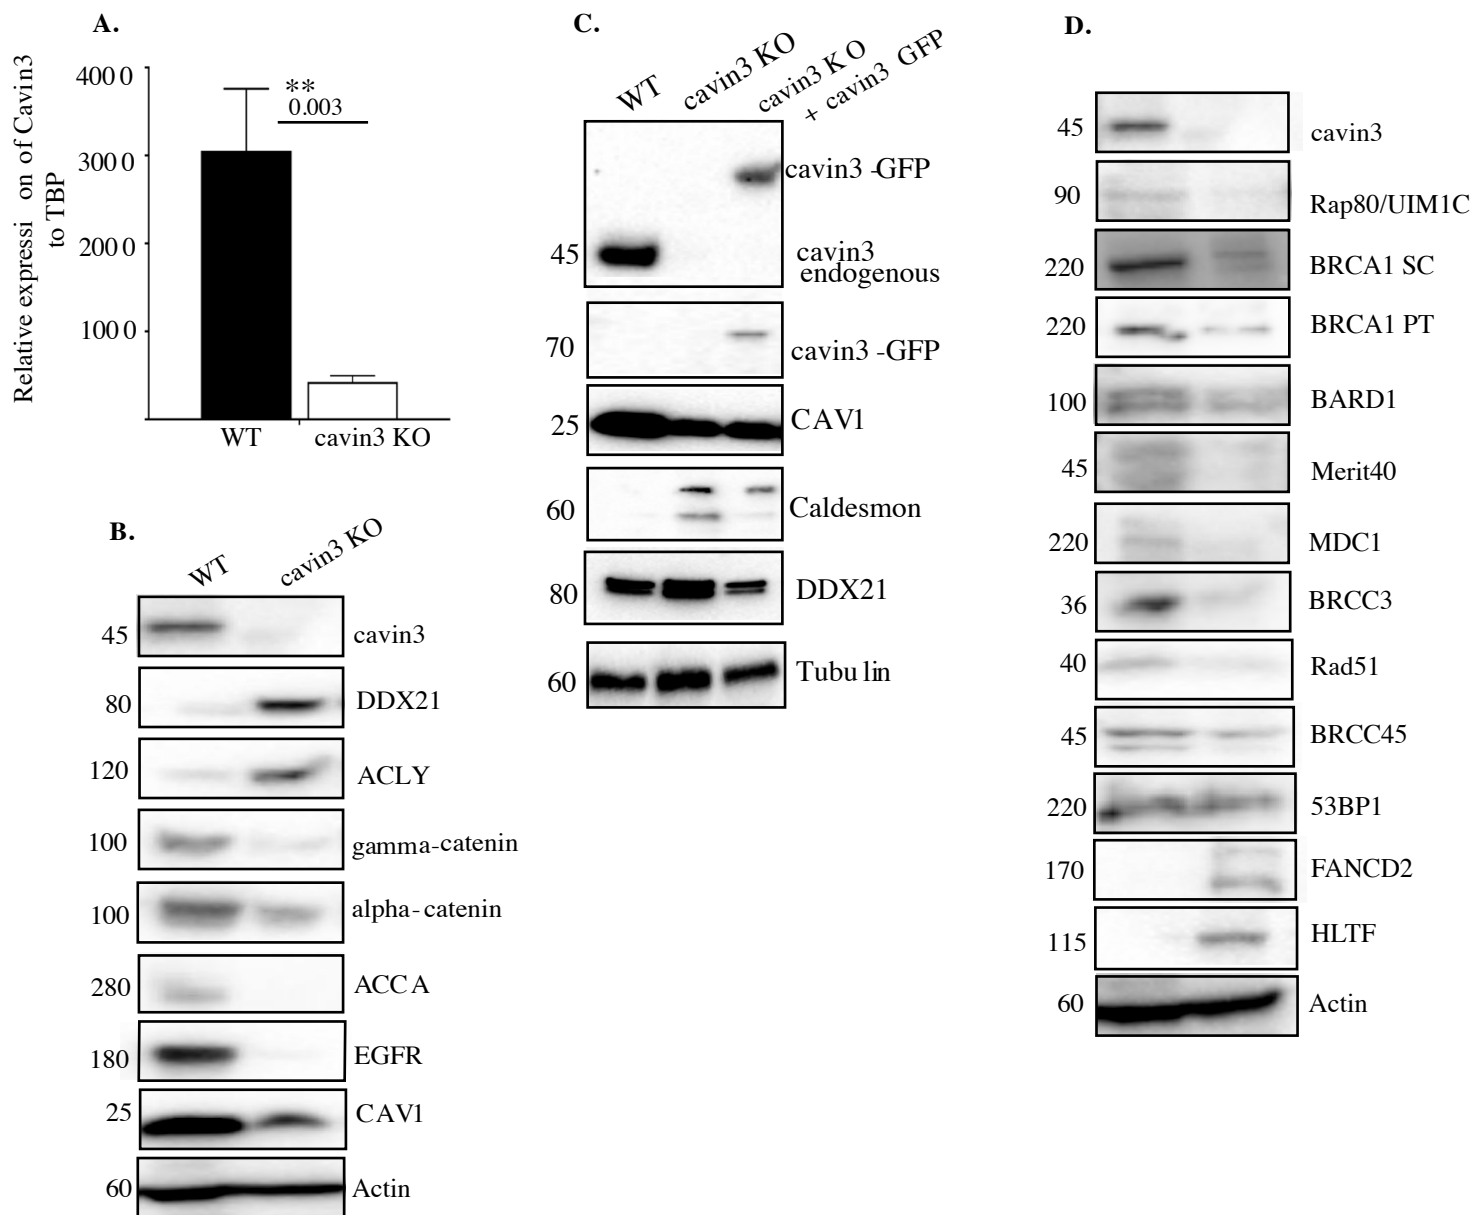

**Figure 1-figure supplement 1.**

Supplement: supp [file elife-61407-supp-v1.zip]

**Figure 6-figure supplement 1.**

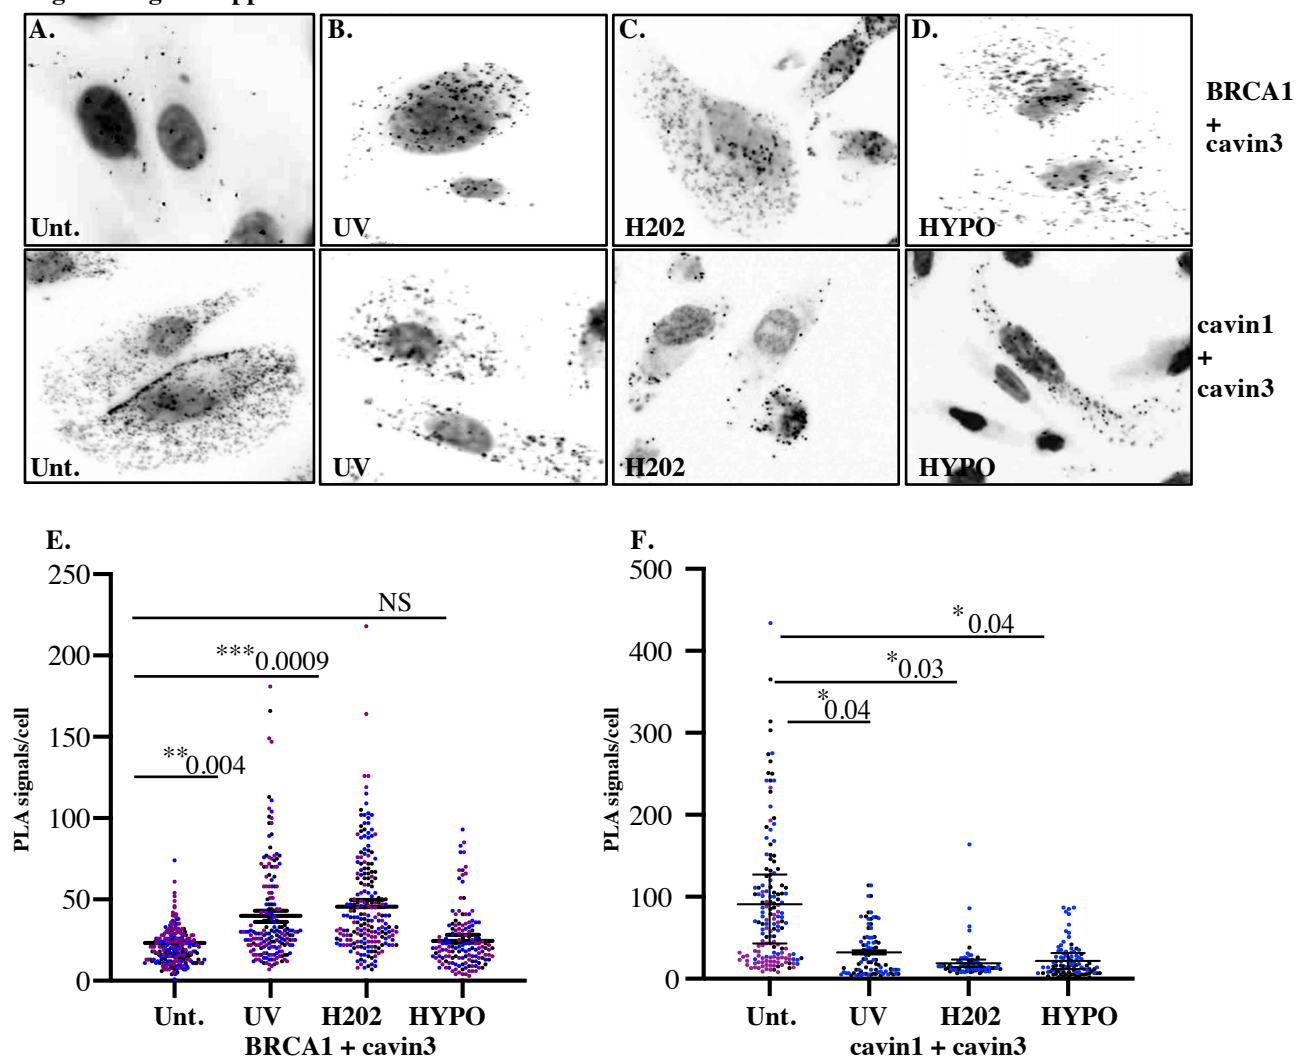

Supplement: supp [file elife-61407-supp-v1.zip]

Figure 7-figure supplement 1.

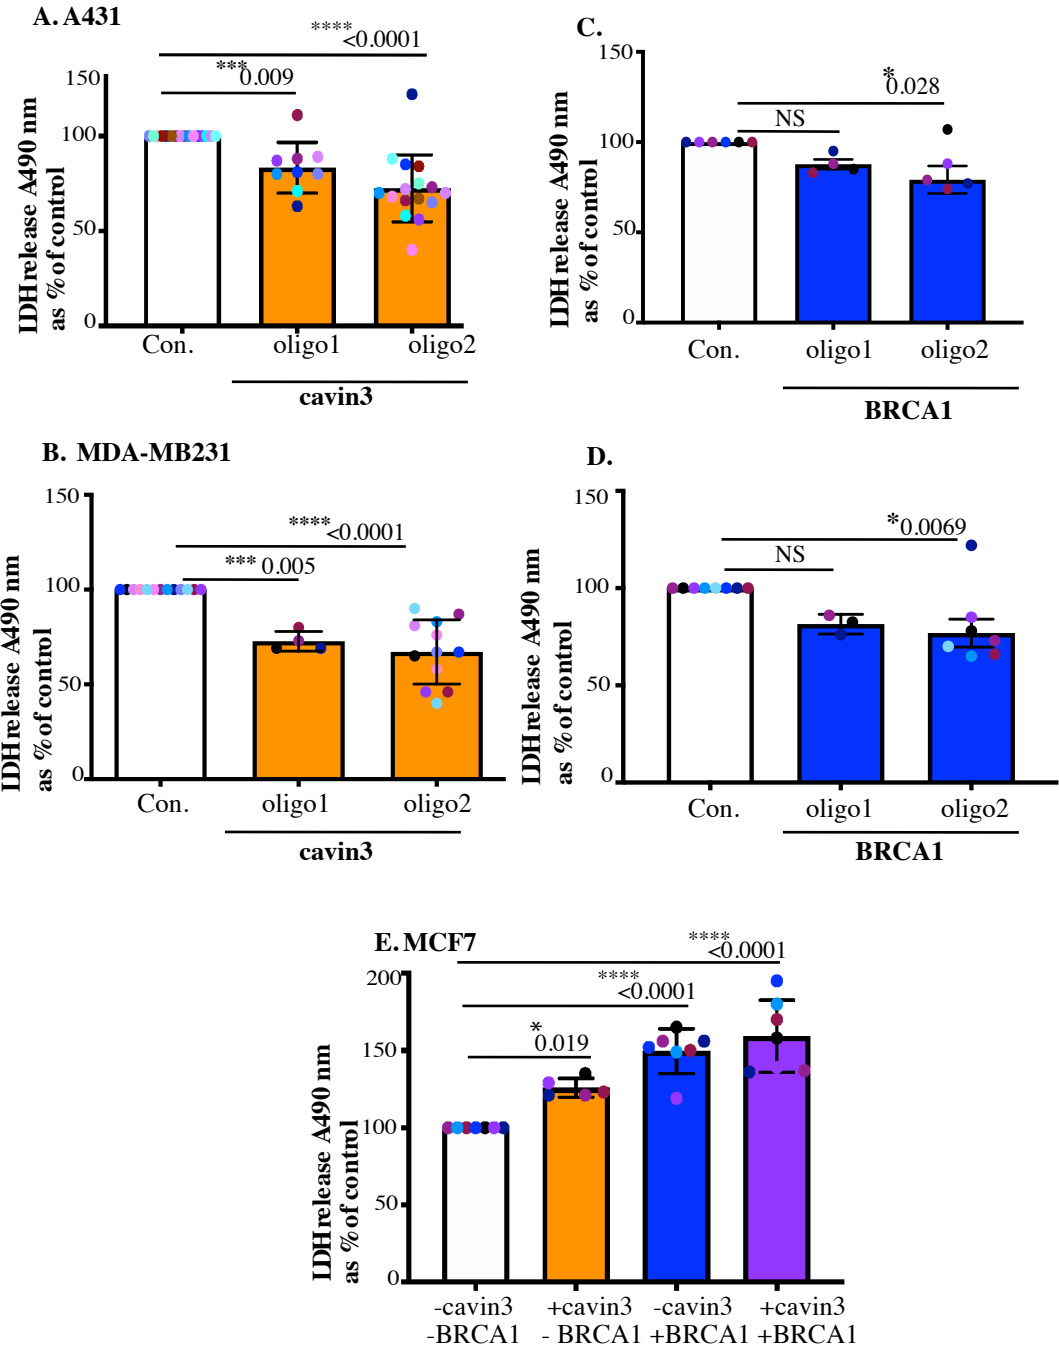

Supplement: supp [file elife-61407-supp-v1.zip]

**Figure 4-figure supplement 1.**

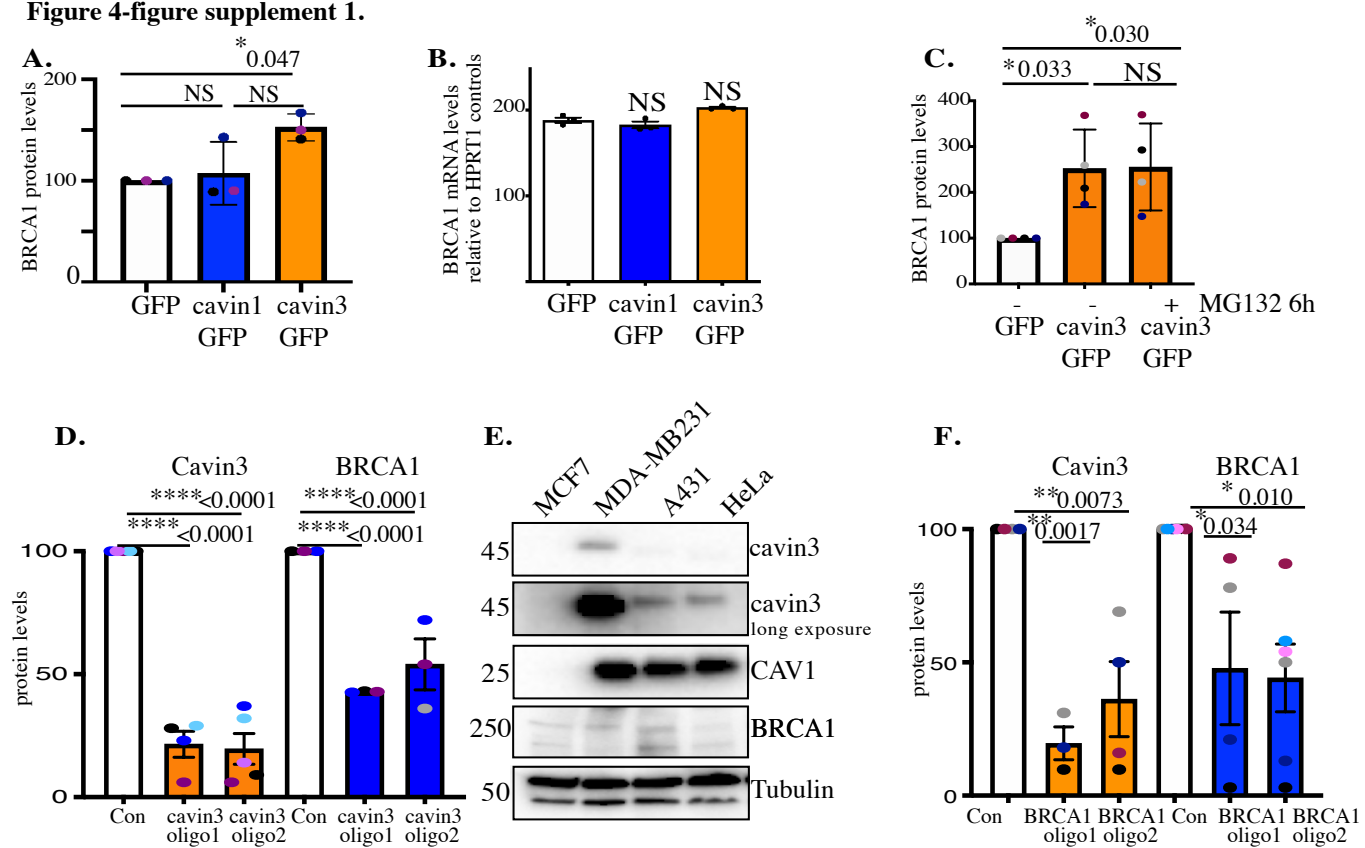

Supplement: supp [file elife-61407-supp-v1.zip]

Figure 6- figure supplement 2.

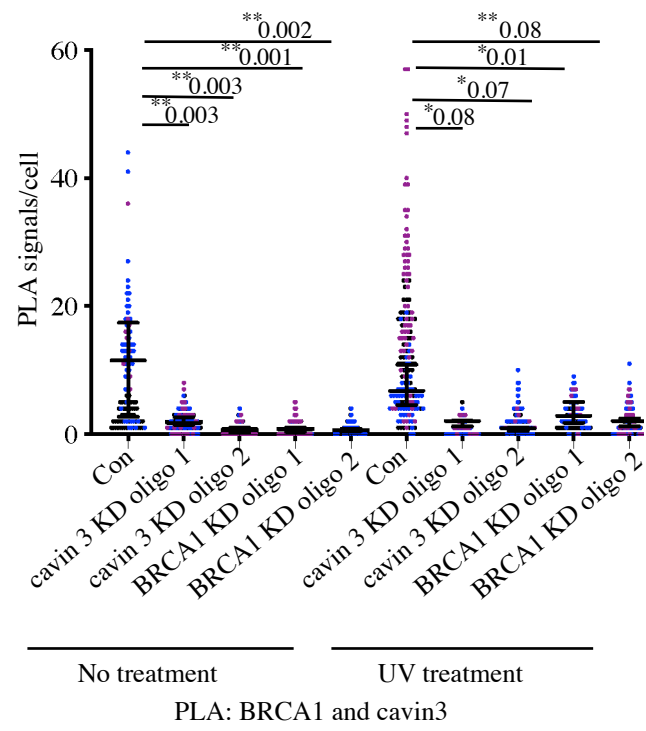

Supplement: supp [file elife-61407-supp-v1.zip]
